# Supplementary material
Source: PubMed Central journal article supplement (PMC3146276)

Figure S1

40m above interface

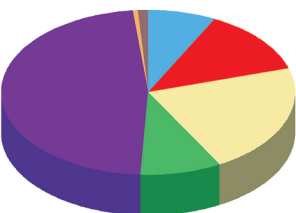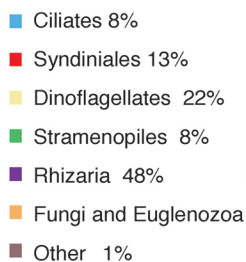

Interface

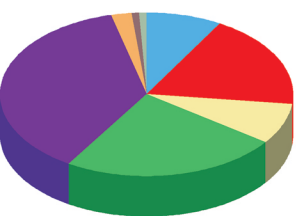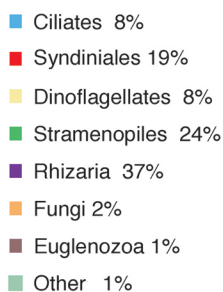

40m below interface

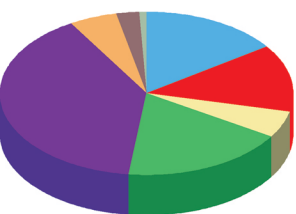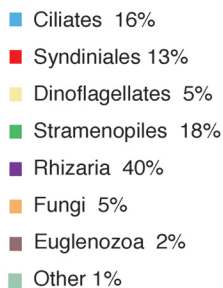

900m

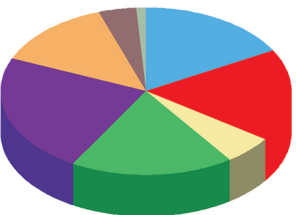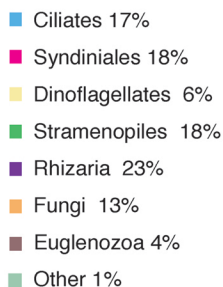

Supplement: ismej20117x1.pdf [file ismej20117x1.pdf]

Figure S2

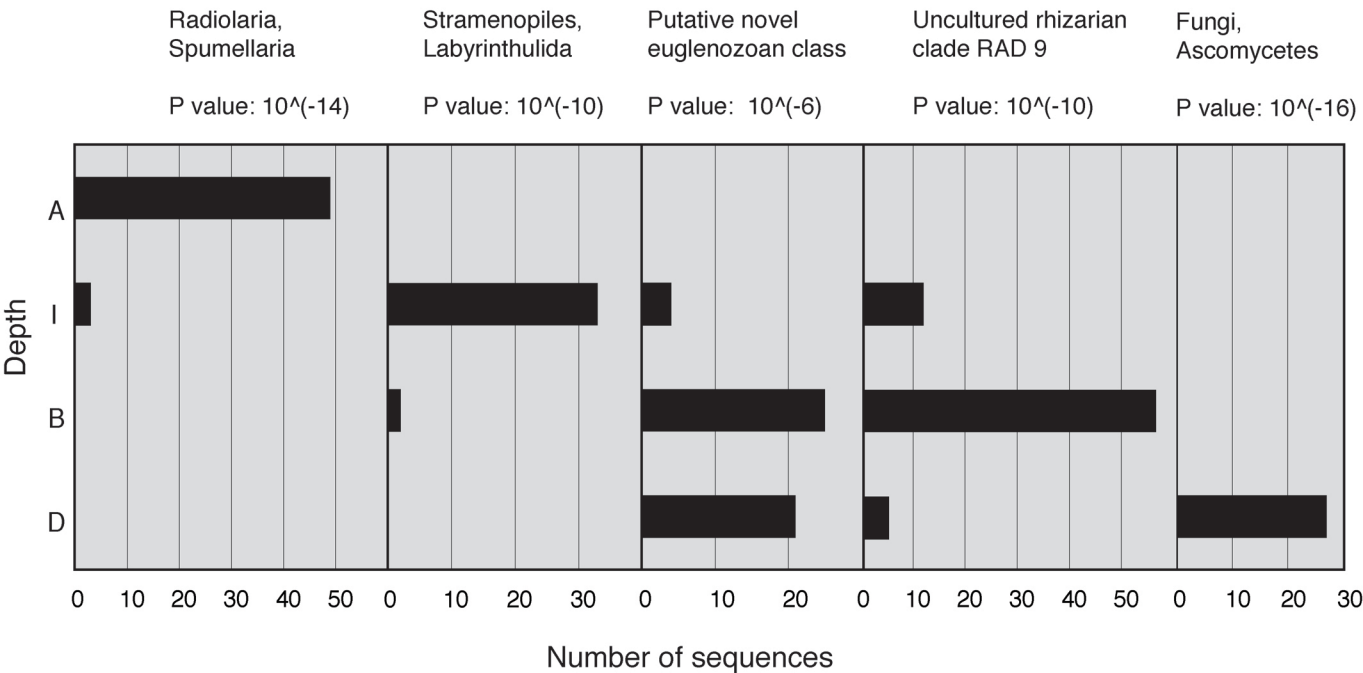

Supplement: ismej20117x2.pdf [file ismej20117x2.pdf]

Figure S3

a.

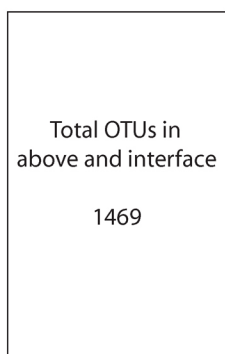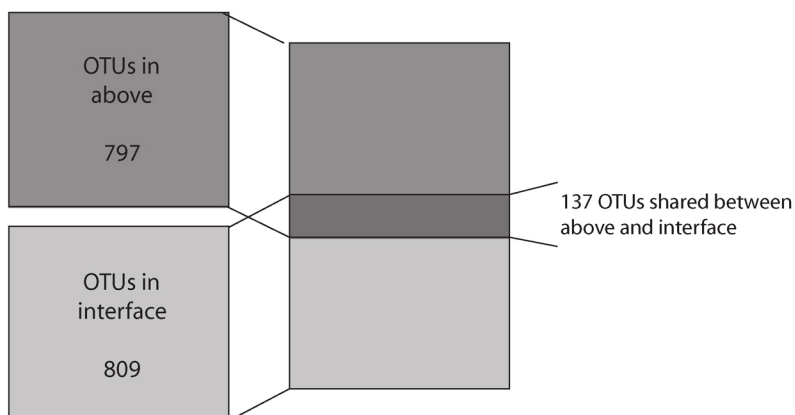

b.

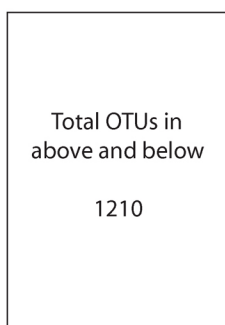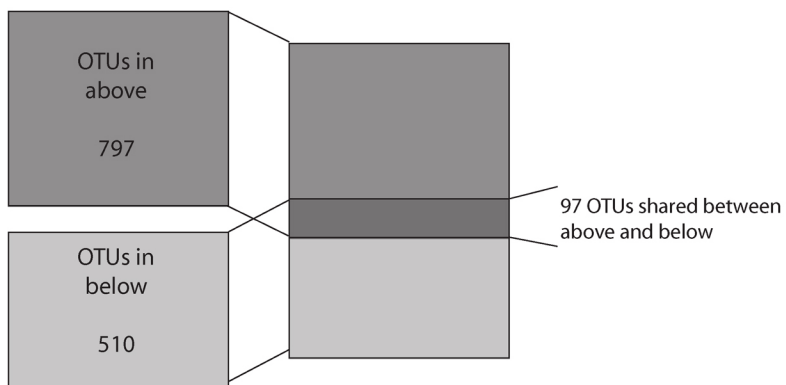

c.

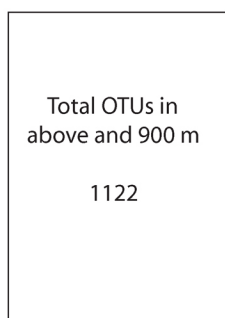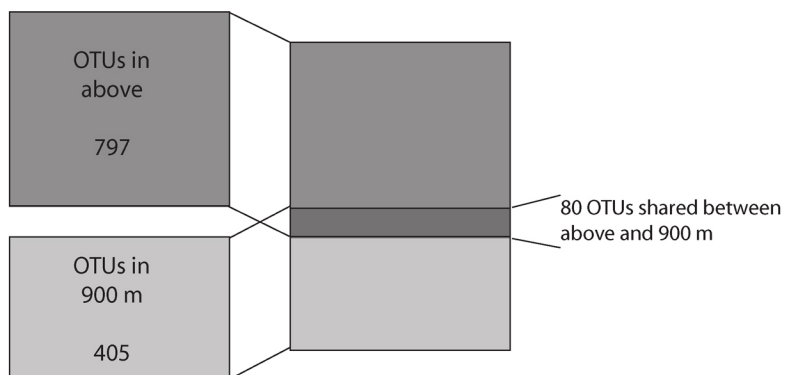

d.

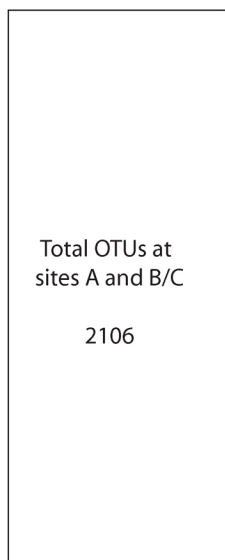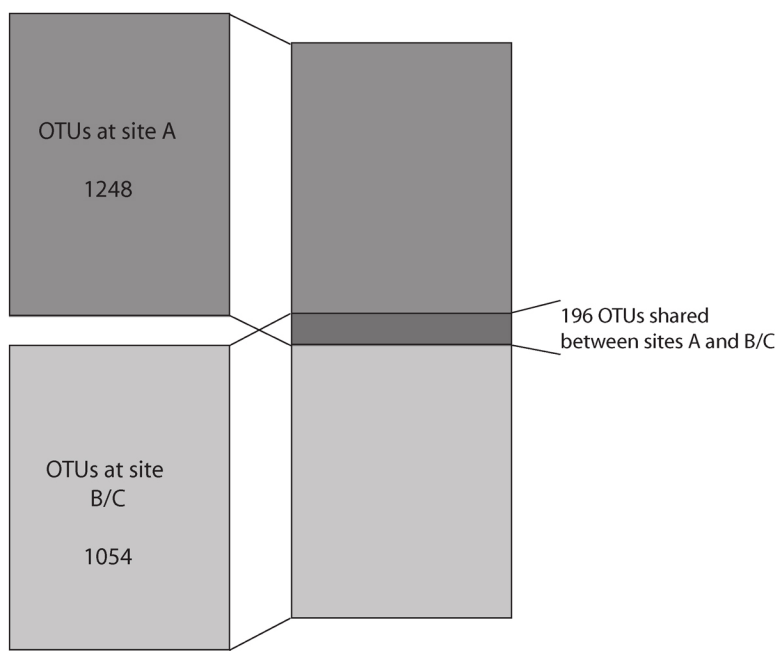

Supplement: ismej20117x3.pdf [file ismej20117x3.pdf]
